# Supplementary material
Source: PubMed Central journal article supplement (PMC3545811)

**Dataset S3: High-resolution version of Bayesian hierarchical clustering of sorghum accessions based on 265,000 SNPs.** Posterior probability of membership (Q) in each population for K=2 to K=19. Color-coding of Q-value bar plots (upper section) is arbitrary, while color-coding for rug plots (lower section) indicates morphological type (see legend). For clarity, only African and Asian source-identified accessions are displayed. The lowest cross-validation error was observed at K=16.

**k = 2**

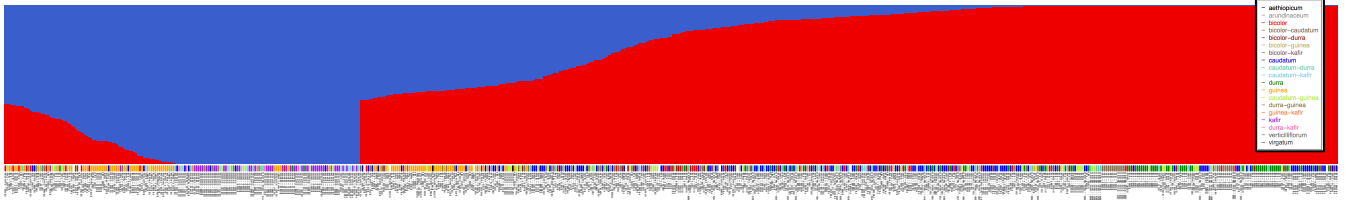

**k = 3**

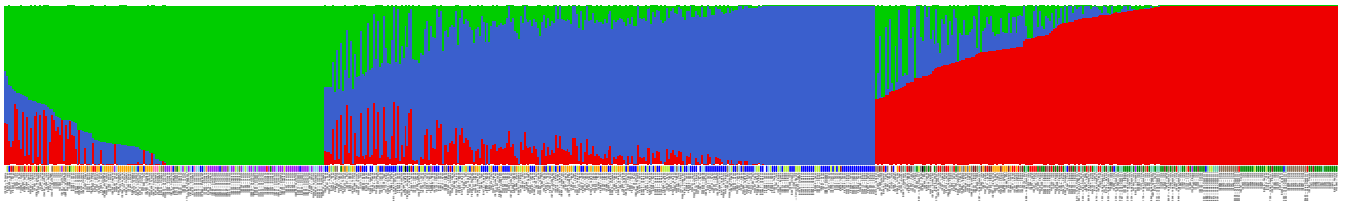

**k = 4**

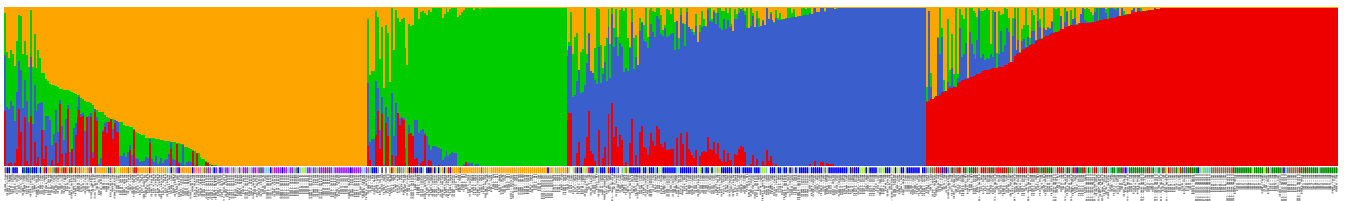

**k = 5**

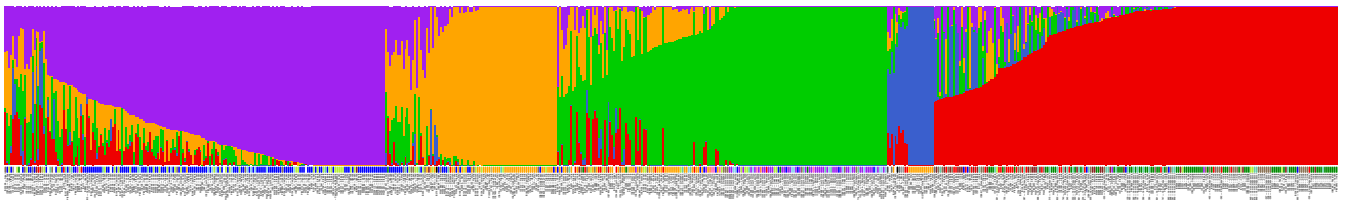

**k = 6**

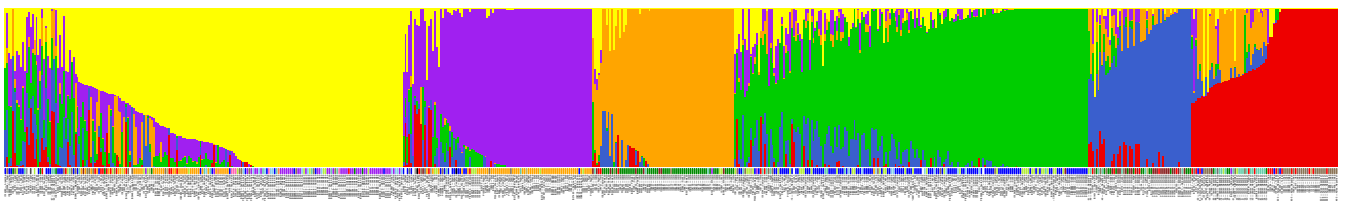

**k = 7**

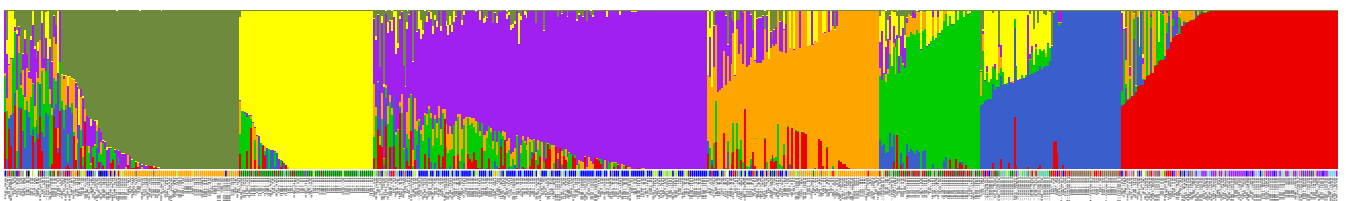

**k = 8**

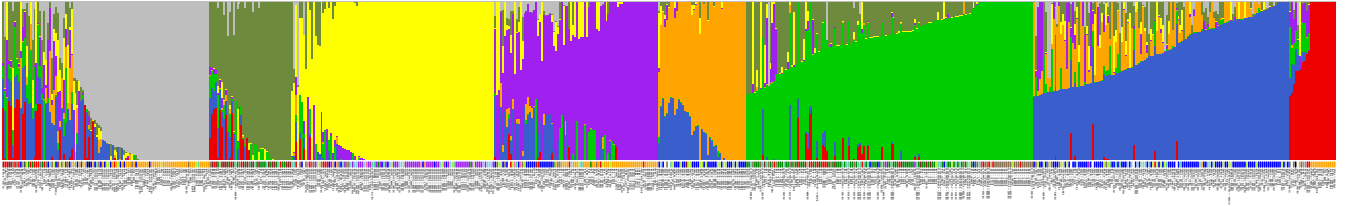

**k = 9**

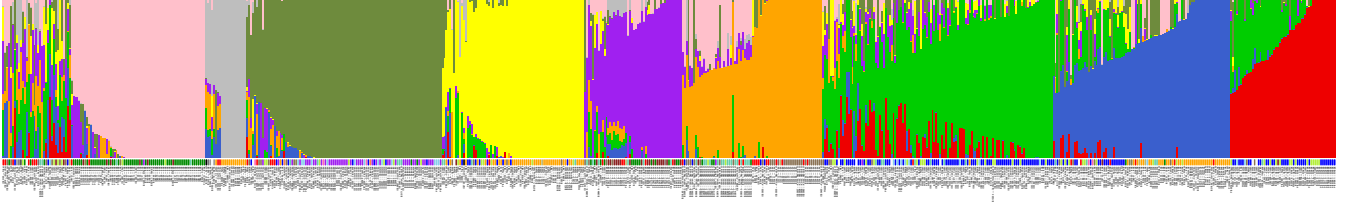

**k = 10**

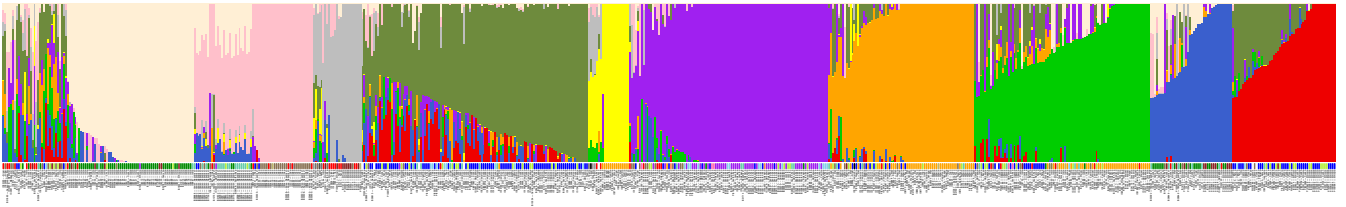

**k = 11**

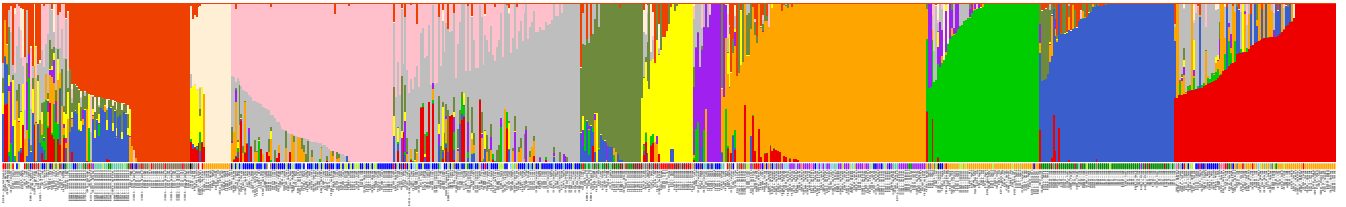

**k = 12**

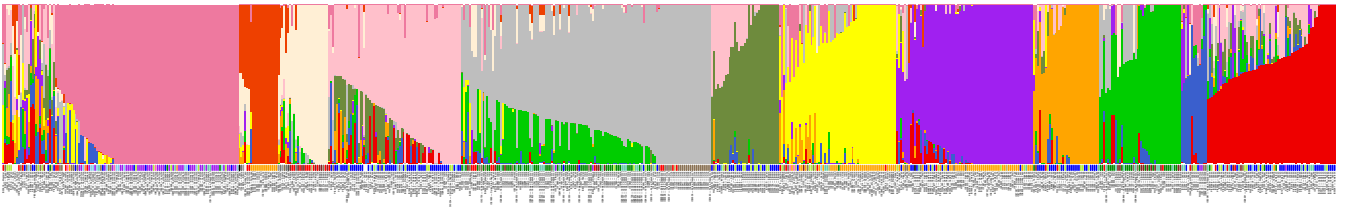

**k = 13**

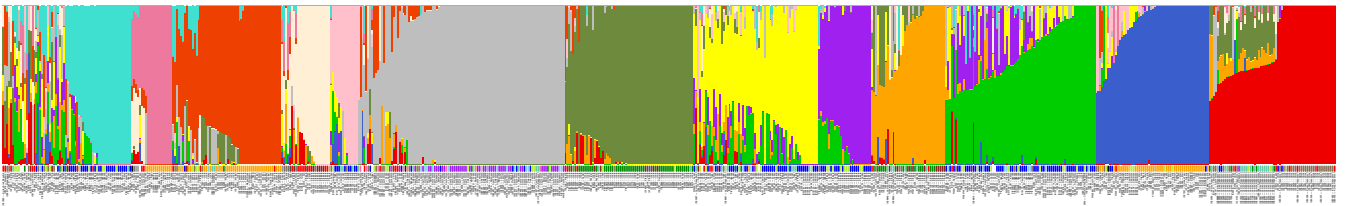

**k = 14**

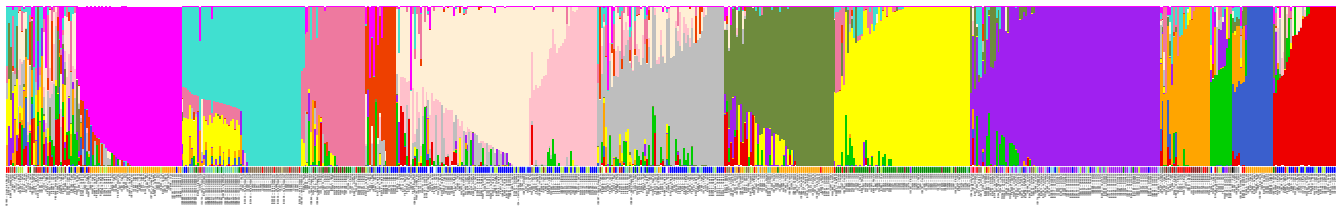

**k = 15**

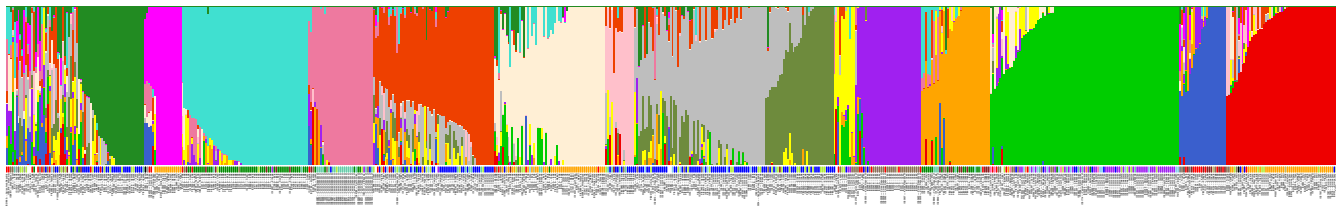

**k = 16**

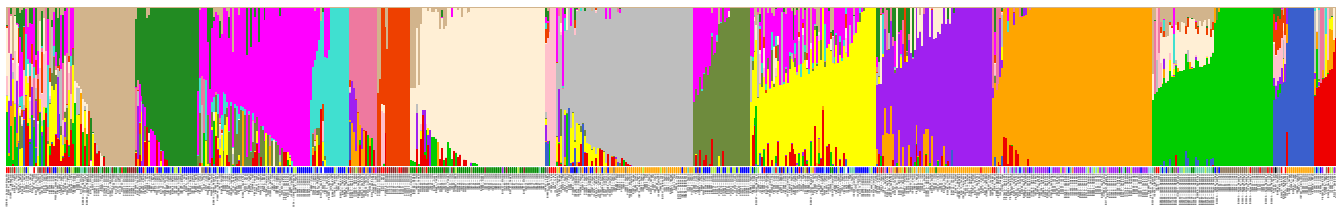

**k = 17**

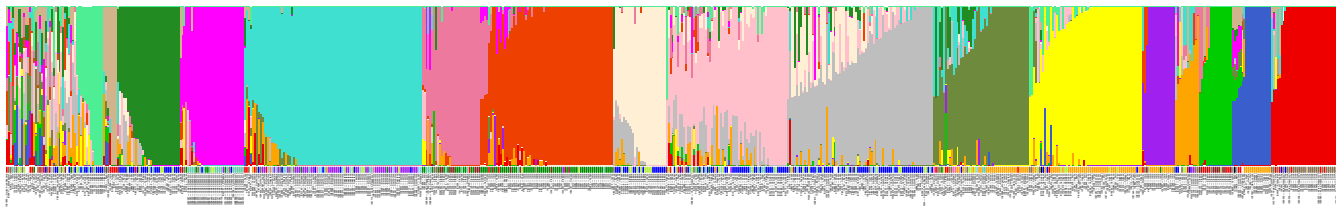

**k = 18**

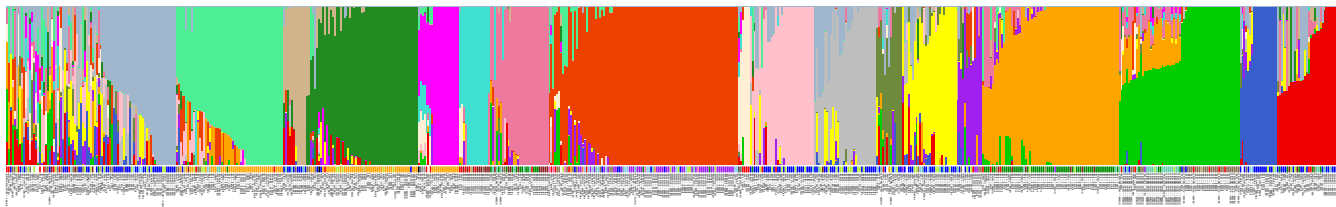

**k = 19**

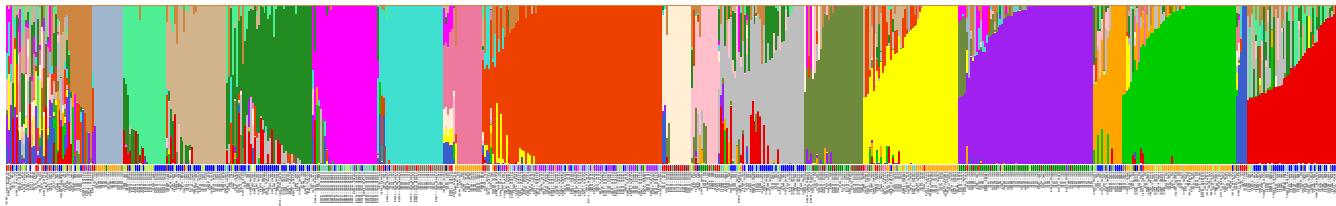

Supplement: 1215985110_sd03.pdf [file 1215985110_sd03.pdf]
